# Supplementary material for: Nonaqueous ionic liquid microemulsions of 1-butyl-3-methylimidazolium tetrafluoroborate, toluene and ethanol
Source: Royal Society of Chemistry journal article supplement (doi:10.1039/c3sm50869b), 2013-01-01
Supplement: c3sm50869b.pdf [file c3sm50869b.pdf]

## Supporting Information

# Nonaqueous ionic liquid microemulsions of 1-butyl-3-methylimidazolium tetrafluoroborate, toluene and ethanol

Jie Xu,<sup>a</sup> Lin Zhang,<sup>a</sup> Aolin Yin,<sup>a</sup> Wanguo Hou<sup>\*b</sup> Ying Yang<sup>c</sup>

<sup>a</sup> State Key Laboratory Base of Eco-chemical Engineering, Qingdao University of Science and Technology, Qingdao 266042, P.R. China;

<sup>b</sup> Key Laboratory of Colloid and Interface Chemistry (Ministry of Education), Shandong University, Jinan 250100, China

<sup>c</sup> Qingdao Institute of Bioenergy and Bioprocess Technology, Chinese Academy of Sciences, Qingdao 266071, China

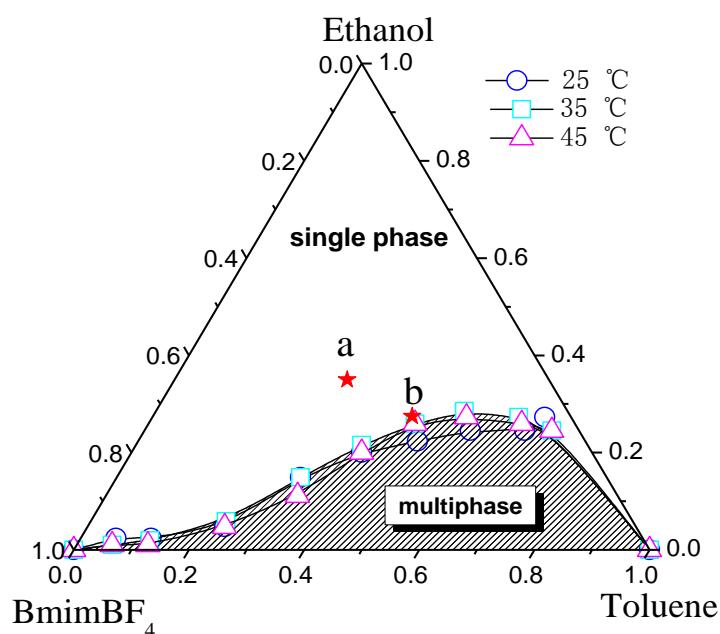

Fig. S1 Effect of temperature on the phase behavior of the  $\text{bmimBF}_4$ /ethanol/toluene ternary system. Samples *a* and *b* were chosen for CV measurements.

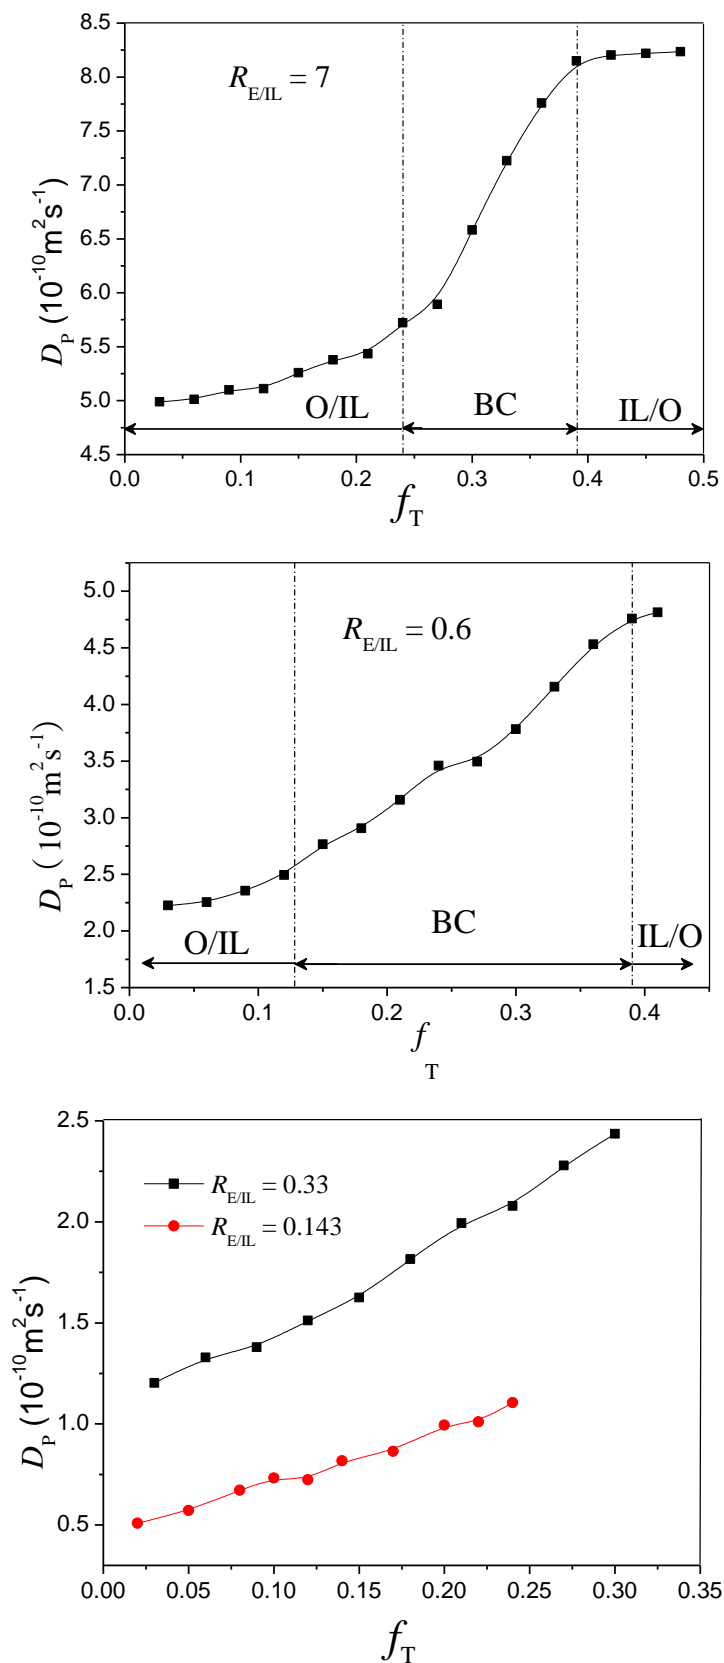

Fig. S2 The diffusion coefficient  $D_P$  of Fc as a function of  $f_T$  at different  $R_{E/IL}$  values.

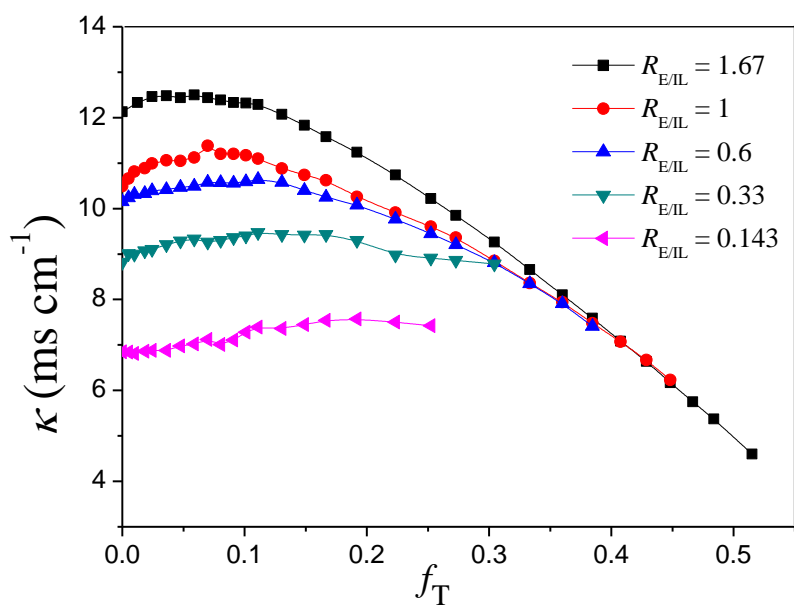

Fig. S3 Electric conductivity of the microemulsions as a function of  $f_T$  at different  $R_{E/IL}$  values.
